1           **Enhancing the darkside: Asymmetric gain of cone**  
2           **photoreceptors underpins discrimination of visual scenes**  
3                           **based on their skewness.**

4   Matthew Yedutenko<sup>1</sup>, Marcus H.C. Howlett<sup>1</sup>, and Maarten Kamermans<sup>1,2</sup>

5   <sup>1</sup>Retinal Signal Processing Lab, Netherlands Institute for Neuroscience, Amsterdam,  
6   Netherlands

7   <sup>2</sup>Department of Biomedical Physics and Biomedical Optics, Amsterdam University Medical  
8   Center, University of Amsterdam, Amsterdam, Netherlands

9

10   Abbreviated Title: Cone responses to skewness

11   Corresponding Author: Maarten Kamermans, [m.kamermans@nin.knaw.nl](mailto:m.kamermans@nin.knaw.nl)

12   10 Figures

13   1 Table

14   Abstract: 169 words

15   Introduction: 648 words

16   Discussion: 1480 words

17

18

19

20

21

22   **Funding**

23   This work was supported by a ZonMW grant 91215062 (M.K.), a grant from Horizon 2020:

24   “Switchboard” (M.K.), a grant of ODAS (M.K.) and a grant of the Foundation of Friends of

25   the NIN (M.K.).

## 26 **Abstract**

27 Psychophysical data indicates humans can discriminate visual scenes based on their skewness  
28 – the ratio of dark and bright patches within a visual scene. It was also shown that on a  
29 phenomenological level this skew discrimination is described by the so-called Blackshot  
30 mechanism, which accentuates strong negative contrasts within a scene. Here we demonstrate  
31 that the neuronal correlate of the Blackshot mechanism is the asymmetric gain of the cone  
32 phototransduction cascade, which is higher for strong negative contrasts than for strong  
33 positive contrasts. We recorded from goldfish cone photoreceptors and found that the  
34 asymmetry in the phototransduction gain leads to higher amplitude of the responses to  
35 negatively than to positively skewed light stimuli. This asymmetry in the amplitude was present  
36 in the photocurrent, voltage response and cone synaptic output. Additionally, we found that  
37 stimulus skewness leads to a subtle change in photoreceptor kinetics. For negatively skewed  
38 stimuli, the cone's impulse response functions peak later than for positively skewed stimulus.  
39 However, stimulus skewness does not affect the cone's overall integration time.

## 40 **Significance statement**

41 Humans can discriminate visual scenes based on skewness – the relative prevalence of bright  
42 and dark patches within a scene. Here we show that this discrimination originates in the  
43 asymmetric gain function of the retinal cone photoreceptors. This gain is higher for the strong  
44 negative (dark patches) than for the strong positive (bright patches) contrasts. Thus, we show  
45 that cone photoreceptors do not simply relay visual stimuli to downstream circuitry, but also  
46 emphasize specific features of those stimuli.

## 47 **Introduction**

48 Psychophysical studies show that humans are sensitive to the ratio of negative (intensity lower  
49 than the mean) and positive (intensity higher than the mean) patches of contrast in visual scenes  
50 (Chubb et al., 1994, 2004; Graham et al., 2016). This ratio is described by the parameter known  
51 as skewness. Visual stimuli are called positively skewed if there is a predominance of negative  
52 contrasts with some infrequent patches of high positive contrast and are called negatively  
53 skewed when the situation is reversed. Figure 1 illustrates one's ability to discriminate visual  
54 scenes based on skewness by mimicking an experiment performed by Chubb et al. (1994,  
55 2004). The textures were randomly drawn from two distributions equal in every aspect but  
56 skewness (Bonin et al., 2006). Yet, one can appreciate the clear difference between negatively  
57 skewed images (right upper) and positively skewed images (remaining panels). Chubb et al.  
58 (1994, 2004) showed that on a phenomenological level the sensitivity to skewness can be  
59 described by the so-called Blackshot mechanism. This Blackshot mechanism does not react to  
60 skewness per se, rather its sensitivity to strong negative contrasts is simply much higher than  
61 to strong positive contrasts and so it effectively reports the fraction of strong negative contrasts  
62 within the scene.

63 What are the neuronal correlates of the Blackshot mechanism? Studies using salamander retinal  
64 ganglion cells (RGC) (Tkačik et al., 2014) and cat lateral geniculate nucleus neurons (LGN)  
65 (Bonin et al., 2006) did not report any response differences associated with changes in stimulus  
66 skewness. Therefore, both studies concluded that the discrimination between skewed stimuli  
67 occurs in the visual cortex. On the other hand, it is well-established that the retinal  
68 photoreceptor's gain is asymmetric: given an equal input magnitude, the response amplitude to  
69 a strong ( $>0.4$  Weber unit) negative contrast step is greater than it is to a strong positive contrast  
70 step (Laughlin, 1981; van Hateren, 2005; Endeman and Kamermans, 2010; Baden et al., 2013;  
71 Angueyra et al., 2021). Furthermore, this responses asymmetry is observed throughout the

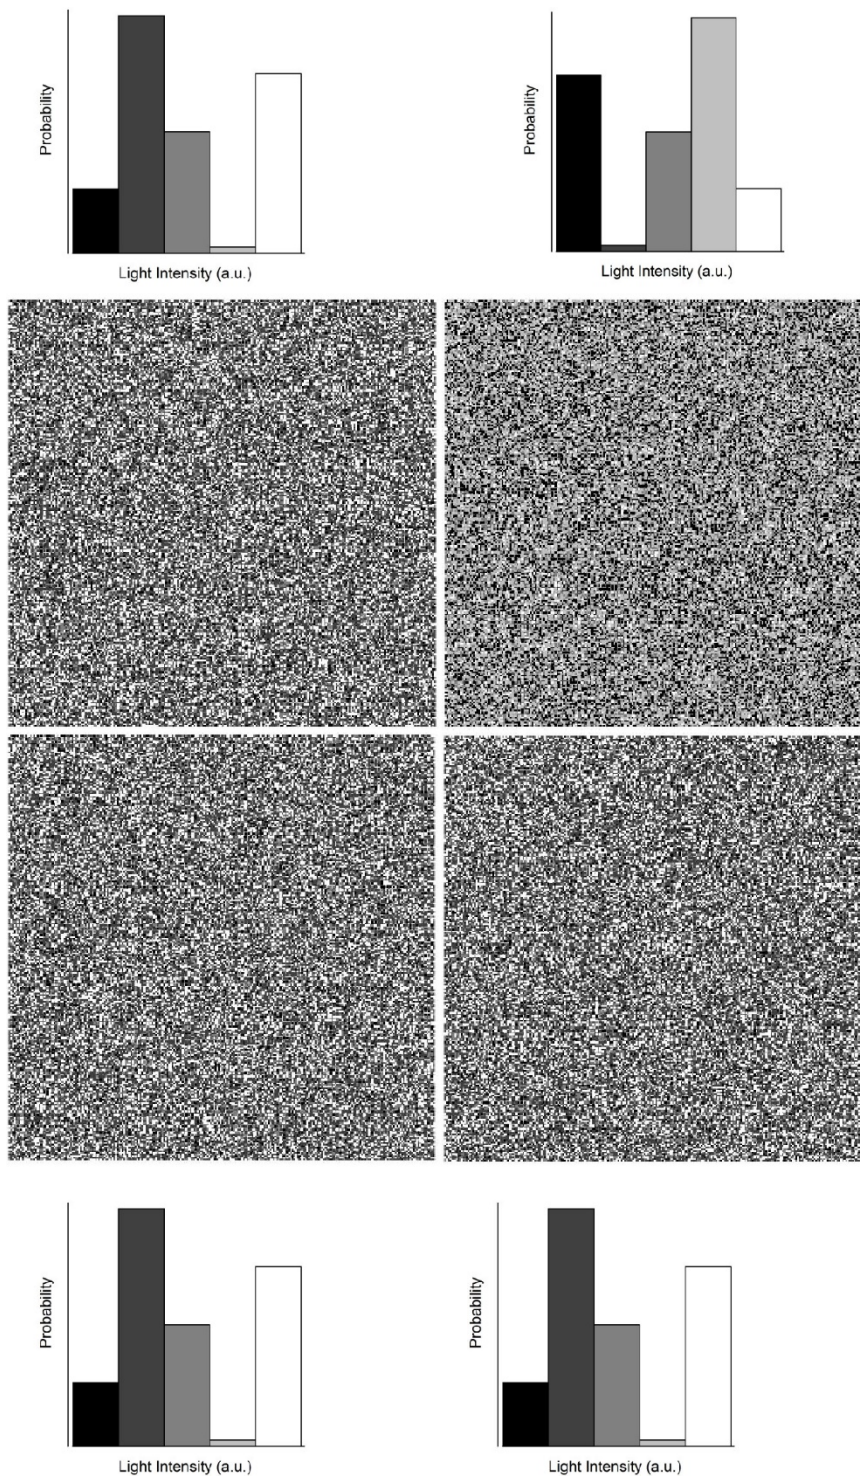

**Figure 1**

The discrimination of skewed stimuli. An example of textures used by Chubb et al. (1994, 2004) to psychophysically probe the ability of humans to discriminate visual scenes based on their skewness. The textures were randomly drawn from the probability distributions adjacent to each panel following the approach described by Bonin et al. (2006) and differed only in terms of skewness. The upper right texture is negatively skewed (-0.4), the remainder are positively skewed (+0.4).

78 post-receptor retinal stages (Lee et al., 2003; Zaghoul et al., 2003), the LGN (Kremkow et al.,  
79 2014), and the primary visual cortex (Zemon et al., 1988; Jin et al., 2008; Yeh et al., 2009;  
80 Kremkow et al., 2014). The asymmetrical processing of positive and negative contrasts should  
81 lead to different response amplitudes to negatively and positively skewed stimuli and thus  
82 might underpin the discrimination of skewed stimuli.

83 A possible reason why the differences in responses to skewed stimuli were not found in RGC  
84 (Tkačik et al., 2014) and LGN (Bonin et al., 2006) studies was the power spectra of the stimuli  
85 used. In both cases, the researchers employed band-limited white noise, where large  
86 proportions of the signal power are outside the photoreceptor frequency bandwidth. Thus, in  
87 both studies temporal filtering discarded a significant portion of the signal, reducing the  
88 skewness and amplitude of the “effective” light stimuli actually available to photoreceptors.  
89 Consequently, Bonin et al. (2006) and Tkacik et al. (2014) may not have found significant  
90 differences in the processing of skewed stimuli because a) their stimuli hardly differed in terms  
91 of “effective” skewness and b) the “effective” amplitudes of the employed stimuli were too  
92 low to drive cone photoreceptors outside their linear response range.

93 Here we address whether photoreceptors process positive and negative skewed stimuli  
94 differently. To account for the kinetics of cone photoreceptors, we stimulated goldfish cones  
95 with sets of skewed stimuli with bandwidth similar to those of the goldfish cones. We found  
96 the asymmetry in goldfish photoreceptor-gain does indeed entail skew-dependent changes in  
97 the cone response, leading to greater response amplitudes to negatively than to positively  
98 skewed stimuli. This asymmetry originates in the cone phototransduction cascade and is the  
99 basis of the Blackshot mechanism. Additionally, we found that the cone’s impulse response  
100 function peaks  $\approx 3.6$  ms later for negatively skewed stimuli whereas the cone’s integration time  
101 is unaffected by stimulus skewness.

## 102 **Materials and Methods**

### 103 **Recording procedures**

104 All animal experiments were conducted under the responsibility of the ethical committee of  
105 the Royal Netherlands Academy of Arts and Sciences (KNAW), acting in accordance with the

106 European Communities Council Directive of 22 July 2003 (2003/65/CE) under license number  
107 AVD-801002016517, issued by the Central Comity Animal Experiments of the Netherlands.  
108 In all experiments retinas of adult goldfish (*Carassius auratus*) were used.

109 Goldfish were first dark-adapted for 5-10 minutes, sacrificed and the eyes enucleated. Retinas  
110 were isolated under dim red illumination then placed photoreceptor side up in a recording  
111 chamber (300  $\mu$ l, model RC-26G, Warner Instruments) mounted on a Nikon Eclipse 600FN  
112 microscope. The preparation was viewed on an LCD monitor by means of a 60 $\times$  water-  
113 immersion objective (N.A. 1.0, Nikon), a CCD camera, and infrared ( $\lambda > 800$  nm; Kodak  
114 wratten filter 87c, United States) differential interference contrast optics. Tissue was  
115 continuously superfused with oxygenated Ringer's solution at room temperature (20 $^{\circ}$ C). The  
116 composition of Ringer's solution was (in mM): 102.0 NaCl, 2.6 KCl, 1.0 MgCl<sub>2</sub>, 1.0 CaCl<sub>2</sub>,  
117 28.0 NaHCO<sub>3</sub>, 5.0 glucose continuously gassed with 2.5% CO<sub>2</sub> and 97.5% O<sub>2</sub> to yield a pH of  
118 7.8 (osmolarity 245–255 mOsm). For calcium current ( $I_{Ca}$ ) measurements, 5 mM of NaCl was  
119 substituted with 5mM of CsCl and 100  $\mu$ M of niflumic acid added.

120 Measurements from goldfish cones were performed in current- (voltage response), and voltage-  
121 (photocurrent), clamp configurations. Patch pipettes (resistance 7-8 MOhm, PG-150T-10;  
122 Harvard Apparatus, Holliston, Massachusetts) were pulled with a Brown Flaming Puller  
123 (Model P-87; Sutter Instruments Company). Patch pipette solution contained (in mM): 96 K-  
124 gluconate, 10 KCl, 1 MgCl<sub>2</sub>, 0.1 CaCl<sub>2</sub>, 5 EGTA, 5 HEPES, 5 ATP-K<sub>2</sub>, 1 GTP-Na<sub>3</sub>, 0.1  
125 cGMP-Na, 20 phosphocreatine-Na<sub>2</sub>, and 50 units ml<sup>-1</sup> creatine phosphokinase, adjusted with  
126 KOH to pH 7.27–7.3 (osmolarity 265–275 mOsm). The chloride equilibrium potential ( $E_{Cl}$ )  
127 was -55mV except when the calcium current ( $I_{Ca}$ ) was studied. Here  $E_{Cl}$  was set at -41 mV by  
128 changing the concentrations of K-gluconate and KCl to 87 and 19 mM, respectively. All  
129 chemicals were supplied by Sigma-Aldrich (Zwijndrecht, the Netherlands), except for NaCl  
130 (Merck Millipore, Amsterdam, the Netherlands).

131 Filled patch pipettes were mounted on a MP-85 Huxley/Wall-type manual micromanipulator  
132 (Sutter Instrument Company) and connected to a HEKA EPC-10 Dual Patch Clamp amplifier  
133 (HEKA Elektronik GmbH, Lambrecht, Germany). After obtaining a whole cell configuration,  
134 cones were first spectrally classified then stimulated with a set of skewed stimuli of  
135 corresponding chromaticity. Data were recorded at a sample rate of 1 kHz using Patchmaster  
136 software package (HEKA Elektronik GmbH). In total, we recorded 14 cones in voltage-clamp  
137 mode (8 light responses, 6 measurements of  $I_{Ca}$ ) and 16 cones in current-clamp mode (all light  
138 responses). The liquid junction potential (approximately -15 to -16 mV) was not compensated.

### 139 **Light stimuli**

140 The light stimulator was a custom-built LED stimulator with a three-wavelength high-intensity  
141 LED (Atlas, Lamina Ceramics, Westhampton, New Jersey, US). The peak wavelengths were  
142 465, 525 and 624 nm. Bandwidth was smaller than 25 nm. Linearity was ensured by an optical  
143 feedback loop. The output of the LED stimulator was coupled to the microscope via an optic  
144 fiber and focused on cone outer segments through a 60× water-immersion objective. The mean  
145 light intensity of all stimuli was  $1.2 \cdot 10^4$  photons/ $\mu\text{m}^2/\text{s}$ , which is in the photopic level for  
146 goldfish (Malchow and Yazulla, 1986). Stimuli were presented at 1 kHz.

147 *Skew Stimulus Set#1*. Skewed stimuli were based on the natural time series of chromatic  
148 intensities (NTSCI) from the Van Hateren library (Van Hateren et al., 2002). The NTSCI power  
149 spectra is typical of that of ‘natural stimuli’ in that power declines as a function of  
150 frequency (Van Hateren, 1997; Van Hateren et al., 2002; Frazor and Geisler, 2006). As a result  
151 of the predominance of lower frequencies, most of the light intensity changes throughout the  
152 NTSCI occur over timescales accessible to goldfish cones and previously the NTSCI has been  
153 used to unlock several non-linear performance features of cones (Endeman and Kamermans,  
154 2010; Howlett et al., 2017). To ensure that all aspects other than skewness remained equal, we

155 first picked short stretches from the NTSCI that were positively skewed, then simply flipped  
156 these around the mean to generate negatively skewed stimuli.

157 To generate Stimulus set#1 we divided the NTSCI (Van Hateren et al., 2002) into one-second  
158 long stretches. Then from each stretch we subtracted its minimum value, adjusted their mean  
159 light intensities to be equal and picked stretches with similar power spectra and root mean  
160 square (r.m.s.), and median contrasts (between 0.23 and 0.25). The r.m.s. and median contrast  
161 for each stretch was calculated respectively as the ratio between the stretch's standard deviation  
162 and its mean, and the ratio between its deviation from the median, and its median. To ensure  
163 an absolute similarity between positively and negatively skewed stimuli, we selected only  
164 stretches where the maximum value was not larger than 2 times the mean. Next, we chose  
165 stretches with skewness's of 0.9, 1.6, 2.2. The skewness was calculated with the equation (1):

$$166 \quad S = \left\langle \frac{(I - I_{\text{mean}})^3}{N\sigma^3} \right\rangle \quad (1)$$

167 where N is the number of elements in stretch, I correspond to the light intensity of an element,  
168  $I_{\text{mean}}$  and  $\sigma$  are mean and standard deviation within the stretch and brackets denotes averaging  
169 over the period.

170 We further narrowed our selection to three stretches all with similar power spectra (data not  
171 shown). Power spectra were calculated by Welch's averaged periodogram method (Welch,  
172 1967). No window function was used, the length of the Fourier transform was same as the  
173 length of each corresponding data sequence. Total stimulus power was calculated as the  
174 integral under power spectra, the differences in the total stimulus power were no more than  
175 10%. Finally, an additional pink noise stimulus with zero-skew and similar power spectra was  
176 added to the set. In total, Skew Stimulus set#1 consisted of seven 1-second stimuli.



177 *Skew Stimulus set#2*. This stimulus set consisted of three 4-second long stretches with a  
178 skewness of 2.2, 0, and -2.2. They were generated in the same way as the Skew Stimulus set#1,  
179 but with one additional condition: the degree of skewness delivered by the stimulus remained  
180 unchanged by the cone's temporal filtering. This was ensured by first convolving the NTSCI  
181 stretch with the mean photocurrent impulse response function (see below) obtained from  
182 responses to Skew Stimulus set #1. The skew of the convolution product, representing the  
183 "effective" stimulus, was then compared with the skew of the original stimulus (Figure 3). This  
184 was further confirmed by determining the effective skewness after convolving the stimuli with  
185 the impulse response function of each cone measured under Skew Stimulus set #2 conditions  
186 (Figure 3B).

## 187 **Calcium current isolation**

188 To measure  $I_{Ca}$ , we used the mean voltage response (7 cells, 69 repeats in total) of cone  
189 photoreceptors to Stimulus set #2 as the command voltages for the voltage clamp experiments.  
190 To isolate  $I_{Ca}$  we followed the approach described by Fahrenhofs et al. (Fahrenfort et al., 1999).  
191 Briefly, to eliminate the calcium-dependent chloride current  $E_{Cl}$  was set at -41 mV and 100  $\mu$ M  
192 of niflumic acid added to the Ringer's solution; delayed rectifying, and hyperpolarization-  
193 activated, potassium currents were blocked by substituting 5 mM of NaCl in Ringer's solution  
194 with 5 mM of CsCl; light-activated conductances were saturated by a 20  $\mu$ m spot of bright  
195 white light focused on the cone outer segment; linear leak currents were removed by  
196 subtraction. The leak current was estimated by clamping cones at -70mV, stepping to potentials  
197 between -100 and 20 mV in 5 mV steps for 100 ms, calculating the mean current between 20  
198 and 60 ms after the step onset, then determining the linear fit of the IV-relation between -100  
199 and -60 mV (Vroman et al., 2014; Kamar et al., 2019).

## 200 **Data analysis**

201 For each cell, the skewness of its mean response to each stimulus was determined using  
202 equation (1). In Figures 2, 3D and 8A, data was fitted using build-in Matlab least square  
203 methods. All data analysis was performed in Matlab and Python.

204 Parallel cascade identification is the most rigorous method to describe the signal processing  
205 properties of cone responses to naturalistic stimuli (Korenberg, 1991) . However, for practical  
206 reasons our analysis only focuses on the estimation of the first parallel cascade, which is  
207 effectively a linear filter followed by a static non-linearity. Apart from the computational and  
208 descriptive simplicity, this approach is also justifiable as it accurately describes cone responses,  
209 accounting for over 95% of the variance (Figure 8A).

210 The linear temporal filtering properties of a cone was described by its impulse response  
211 function. Impulse response functions were estimated as the inverse Fourier transform of the  
212 ratio between stimulus-response cross-power and stimulus power spectrum (Wiener, 1964;  
213 Kim and Rieke, 2001). The spectra were calculated using Welch averaged periodogram method  
214 (Welch, 1967). Stimuli and responses were detrended, divided into 500 ms long stretches, with  
215 50% overlap, and windowed with a hamming function. The length of the Fourier transform  
216 was 1024 ms. Cone integration time was calculated as the integral of the impulse response  
217 function's initial polarization lobe (Daly and Normann, 1985).

218 To estimate the effective” stimuli perceived by each cone photoreceptors during each stimulus,  
219 we convolved the cone's impulse response function during that condition with the original light  
220 stimulus. Skews of these “effective” stimuli were calculated with equation (1). Discrepancies  
221 between the skewness of the “effective” stimuli and the skewness of the cone's responses, were  
222 considered a result of non-linear cone properties.

223 For “effective” Weber contrast steps (Figures 7&8A), light stimuli were first converted into  
224 Weber contrasts steps (Figure 7) with equation (2):

$$225 \quad C = \frac{(I - I_{mean})}{I_{mean}} \quad (2)$$

226 These Weber contrast steps were then convolved with a mean impulse response function to  
227 obtain the “effective” Weber contrast steps. The mean impulse response function used here  
228 was the averaged voltage-response derived impulse response function of all 16 cones measured  
229 in current clamp, which was subsequently scaled such that the integral under its curve yielded  
230 one (Figure 7; Howlett et al., 2017). Even though a cone’s impulse response function is affected  
231 by the skewness of the stimulus (Figure 8B&C), we used this mean impulse response function  
232 for the following reasons.

233 Firstly, observed changes to the impulse response function shape had little effect on the cone  
234 response dynamics. We convolved Skew Stimulus Set #2 with impulse response functions  
235 derived from responses to positive and negative stimulus of each of the cones (n=7) and found  
236 that the resulting convolution products were highly correlated ( $r \approx 0.98 \pm 0.01$ ). Secondly,  
237 averaging across different stimulus skew conditions was crucial to account for biases in the  
238 estimate of the amplitude of the impulse response function arising from skewness of the light  
239 stimuli (Chichilnisky, 2001; Simoncelli et al., 2004; Bonin et al., 2006; Tkačik et al., 2014).  
240 Finally, the goal of this analysis was to illustrate cone photoreceptor gain asymmetries rather  
241 than to provide a veridical description of the gain dependence on stimulus contrast.

242 To estimate the cone’s non-linear gain function parameters we fitted the relationship between  
243 all the mean cone voltage responses and the “effective” Weber contrast steps (Figure 8A, 19000  
244 data points) as the power function of input contrast (Van Hateren and Snippe, 2006) with  
245 equation 3:

246 
$$\Delta V = a * (C + b)^d + e \quad (3)$$

247 Here  $\Delta V$  denotes voltage response, C is the “effective” Weber contrast, a, b, d, and e are fit  
248 parameters. At the biophysical level b) corresponds to the baseline rate of phosphodiesterase  
249 activity (PDE), d) describes the inter-dependence between the PDE activity rate and the voltage  
250 response, e) is proportional to the baseline concentration of cyclic guanosine monophosphate  
251 and a) is a scaling factor (Van Hateren and Snippe, 2006). The quality of the fit was quantified  
252 with the adjusted coefficient of determination ( $R^2$ ). The highest  $R^2$  (0.95) was obtained using  
253 the following parameter values (value  $\pm$  95 % confidence interval): a=0.05138  $\pm$  0.03506,  
254 b=1.166  $\pm$  0.072, d= -0.1251  $\pm$  0.0959, e=-0.05046  $\pm$  0.03552. Our estimation of the power  
255 function (d) was close to that obtained by Van Hateren and Snippe (2006) in their theoretical  
256 study.

## 257 **Model**

258 Photoreceptor responses were modelled in matlab using Van Hateren’s model of vertebrate  
259 photoreceptors (van Hateren and Snippe, 2007), which was shown to be remarkably precise in  
260 capturing the processing steps involved in generating a cone’s signal. Apart from the activation  
261 of hyperpolarization-activated current ( $I_h$ ; Howlett et al., 2017; Kamermans et al., 2017), the  
262 model closely simulates all the cone’s biophysical processing steps from the photon-initiated  
263 activation of conopsins to the cGMP-regulated changes in the photocurrent, followed by the  
264 generation of the voltage response. The model simulates cone photoreceptors as a cascade of  
265 low-pass filters, a static (instantaneous and memoryless) non-linearity, and two divisive  
266 feedback loops (van Hateren, 2005; van Hateren and Snippe, 2007). The low-pass filters  
267 correspond to the kinetics of the different biophysical processing steps. The non-linearity  
268 describes the inverse proportional dependence between light intensity and changes in the  
269 cGMP concentration. The first feedback loop describes the regulation of the rate of cGMP

270 production by calcium influx through cGMP-gated channels. The second feedback loop  
271 corresponds to the regulation of the membrane voltage by voltage-sensitive channels in the  
272 cone inner segment. The cone's non-linear gain (Figure 8A) originates from the interplay  
273 between the hydrolysis of the cGMP by PDE and calcium-regulated (feedback loop) production  
274 of the cGMP by guanylyl cyclase (GC)

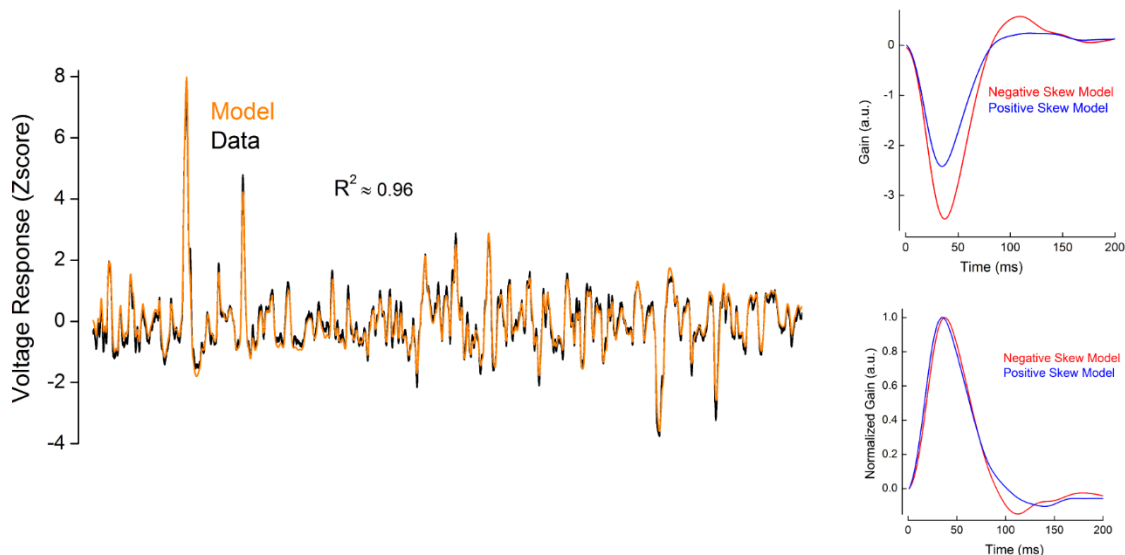

275

## 276 **Figure 2**

277 Example of the performance of the Van Hateren model for goldfish cones. Left. Voltage responses as Z-scores to  
278 Skew Stimulus set #2 for a representative recorded cone (black line) and for the simulated cone (orange line). The  
279 coefficient of determination ( $R^2$ ) between these two traces was 0.98. Right. Impulse response functions obtained  
280 from the simulated responses to negatively (red) and positively (blue) skewed stimuli. Parameters for the  
281 simulation are listed in the Table 1.

282 We verified that the Van Hateren model could capture responses to skewed stimuli. For this  
283 we fitted the model to the voltage responses of 7 goldfish cones recorded under Skew Stimulus  
284 Set#2 conditions. The model parameters were modulated within the ranges determined by  
285 Endeman and Kamermans (2010) and are shown in the Table 1. For all 7 cells, the correlation  
286 coefficient between modelled and recorded voltage responses were no less than 0.97 (adjusted  
287  $R^2 \geq 0.94$  Figure 2). Moreover, the impulse response functions estimated from the simulated

288 responses to positively and negatively skewed stimuli retained features of the impulse response  
289 functions derived from the recorded voltage responses. For example, for both recorded and  
290 simulated cone voltage responses, impulse response functions peaked 3 ms ( $8.5 \pm 1\%$ ,  
291  $p=0.00013$ ) later under the negatively skewed stimulus compared to the positively skewed  
292 condition but showed no statistically significant difference in their full width at half maximum  
293 (FWHM), or in integration time (Figure 2). Thus, Van Hateren's model reproduces accurately  
294 cone responses to skewed stimuli.

295 Next, we used the Van Hateren model to estimate the "effective" stimuli perceived by  
296 salamander and cat cones in the studies by Tkacik et al. (2014) and Bonin et al. (2006),  
297 respectively. To model salamander cones we adjusted the parameters of Van Hateren's model  
298 such that the time course of the impulse response functions of simulated cones resembled those  
299 of salamander cones reported by Rieke (2001) and Baccus and Meister (2002). The exact  
300 simulation parameters are reported in the Table 1. Similarly, to model cat cones the Van  
301 Hateren model parameters were adjusted so that the impulse response function time course  
302 resembled the estimates made by Donner and Hemila (1996). For the cat, exact parameters of  
303 the simulation are reported in the Table 1.

304 "Light" stimuli mimicking those used by Bonin et al. and Tkacik et al. (2014) where  
305 respectively used to study the responses of the modelled cat (Figure 9) and salamander (Figure  
306 10) cones to changes in skewness. The only difference was that for illustrative ease the  
307 positively and negatively skewed stimuli were mirror copies of each other. Cat stimuli had a  
308 r.m.s. contrast of 0.7, skews of  $\pm 0.4$  and a flat power spectrum bandlimited to 124 Hz.  
309 Salamander stimuli had a r.m.s. contrast of 0.2, skews of  $\pm 2$  and a flat power spectrum  
310 bandlimited to 30 Hz.

## 311 **Statistics**

312 All data are presented as mean  $\pm$  SEM unless otherwise stated. Differences between groups  
313 were tested using two-tailed t-test (Student, 1908).

## 314 **Results**

### 315 **Cone responses vary with skewness**

316 To assess the photoreceptor's contribution to skew discrimination, we exposed goldfish cones  
317 to a series of modified naturalistic time series of chromatic intensities (NTSCI) from the Van  
318 Hateren library (Van Hateren et al., 2002; Skew Stimulus set#1 in Material and Methods) and  
319 recorded their photocurrent and voltage responses (Figure 3A). Stimuli were equal in terms of  
320 mean intensity, root mean square contrast and median contrast, and had similar power spectra,  
321 while their skewness varied from -2.2 to +2.2. Positively and negatively skewed stimuli were  
322 mirror copies of each other, therefore any asymmetries between corresponding responses  
323 would reflect an asymmetry in the cone's processing.

324 To determine whether cones process negatively and positively skewed light stimuli differently,  
325 we plotted the skews of the photocurrent (Figure 3B) and voltage responses (Figure 3C) against  
326 the skews of the light stimuli. If there is no difference in processing, the skewness of the  
327 response will be equal to the light stimulus skewness and thus the data points will fall along a  
328 straight slope. However, if there is an asymmetry in the processing of positive and negative  
329 contrasts it would necessarily lead to the deviation of the data points from the grey line. Figures  
330 3B&C shows that for positively skewed stimuli, the photocurrent and voltage responses are  
331 skewed to a lesser degree than are the light stimuli, whereas for the negatively skewed stimuli  
332 they are almost as equally skewed as the light stimuli. Note that the signal sign-inversion of  
333 the voltage response also sign-inverts its skewness. Figures 3B&C indicate an asymmetry in  
334 the processing of negatively and positively skewed stimuli by cone photoreceptors.

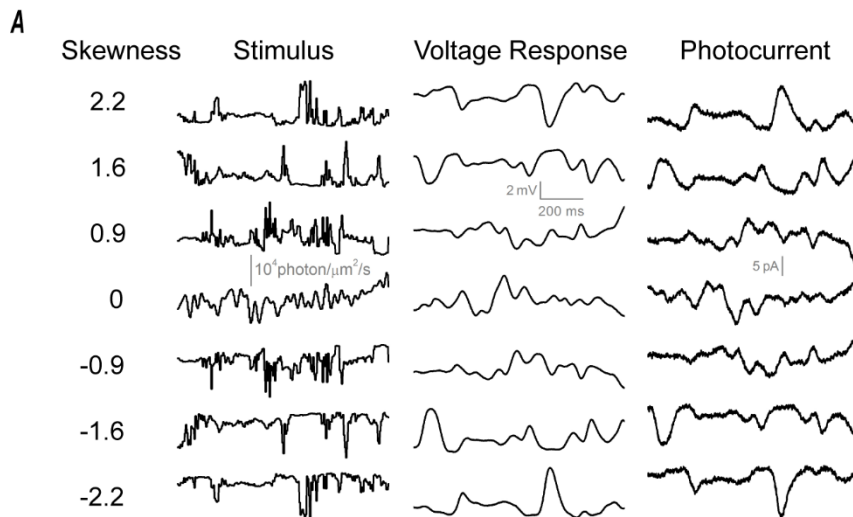

**Figure 3**

Cone processing affects stimulus skewness. **A.** Skew Stimulus set #1 (left) together with examples of voltage (middle), and photocurrent (right), responses recorded from cone photoreceptors. **B.** Photocurrent skewness as a function of stimulus skewness for Skew Stimulus set #1 (n=8). Each black square represents the skewness of a cell's photocurrent response to a skewed stimulus condition. The grey line depicts the situation where the response skewness is equal to the stimulus skewness. The panel shows cone responses to positive skewed stimuli were less skewed than their

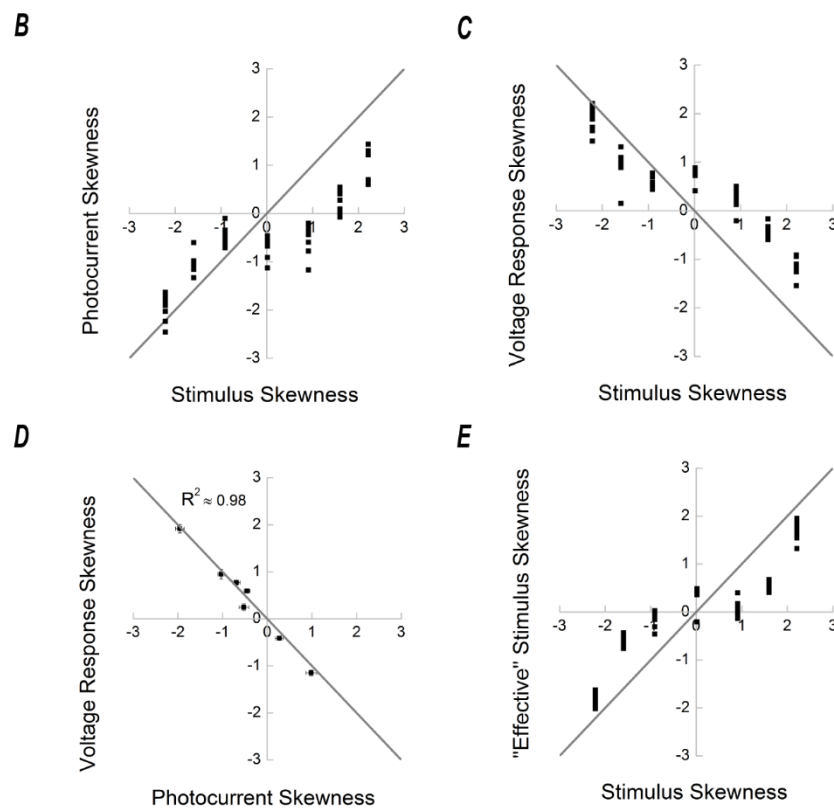

357 stimulus, but to stimuli with zero or negative skews cone responses were more skewed than their stimulus. **C.**  
 358 Voltage response skewness as a function of stimulus skewness (n=9). Note that the voltage responses and stimuli  
 359 skews have different sign due to the signal sign-inversion. The grey line describes the situation where response  
 360 and stimulus skews are equal in magnitude. As was the case in B), cone responses to positive skewed stimuli were  
 361 less skewed than their stimulus. To stimuli with zero or negative skews, the skewness of the cone's response was  
 362 greater than that of its stimulus. **D.** Skewness of the voltage response as a function of the photocurrent. For each  
 363 stimuli condition, the skews of each corresponding voltage response, and photocurrent, were averaged and the  
 364 resulting means ( $\pm$ SEM) plotted as a voltage response verses photocurrent function. Note that as the cone's voltage



365 response is sign-inverted relative to its photocurrent their skews are also sign inverted. The situation where the  
366 voltage response and photocurrent have equal magnitude of skewness is described by the grey line, which fits the  
367 data with adjusted  $R^2$  of  $\approx 0.98$ . This indicates that the asymmetric processing of positively and negatively skewed  
368 inputs originates in the phototransduction cascade. **E.** “Effective” skewness perceived by the cones as the function  
369 of the skewness of the light stimuli. “Effective” skews were estimated from the convolution product of the light  
370 stimuli with the cone’s impulse response function (Figures 4A&B). The grey line depicts the situation, where  
371 “effective” and response skews are equal. Note that for illustrative convenience the “effective” skewness  
372 estimated from voltage responses were multiplied by -1. Figure 3E indicates that even though naturalistic stimuli  
373 were used, some aspects of the stimuli were still unavailable to drive cone responses on account of the cone’s  
374 temporal filtering properties. This in turn reduced the range of “effective” skews by almost 30% relative to the  
375 original -2.2 to +2.2 range of stimulus skews.

376

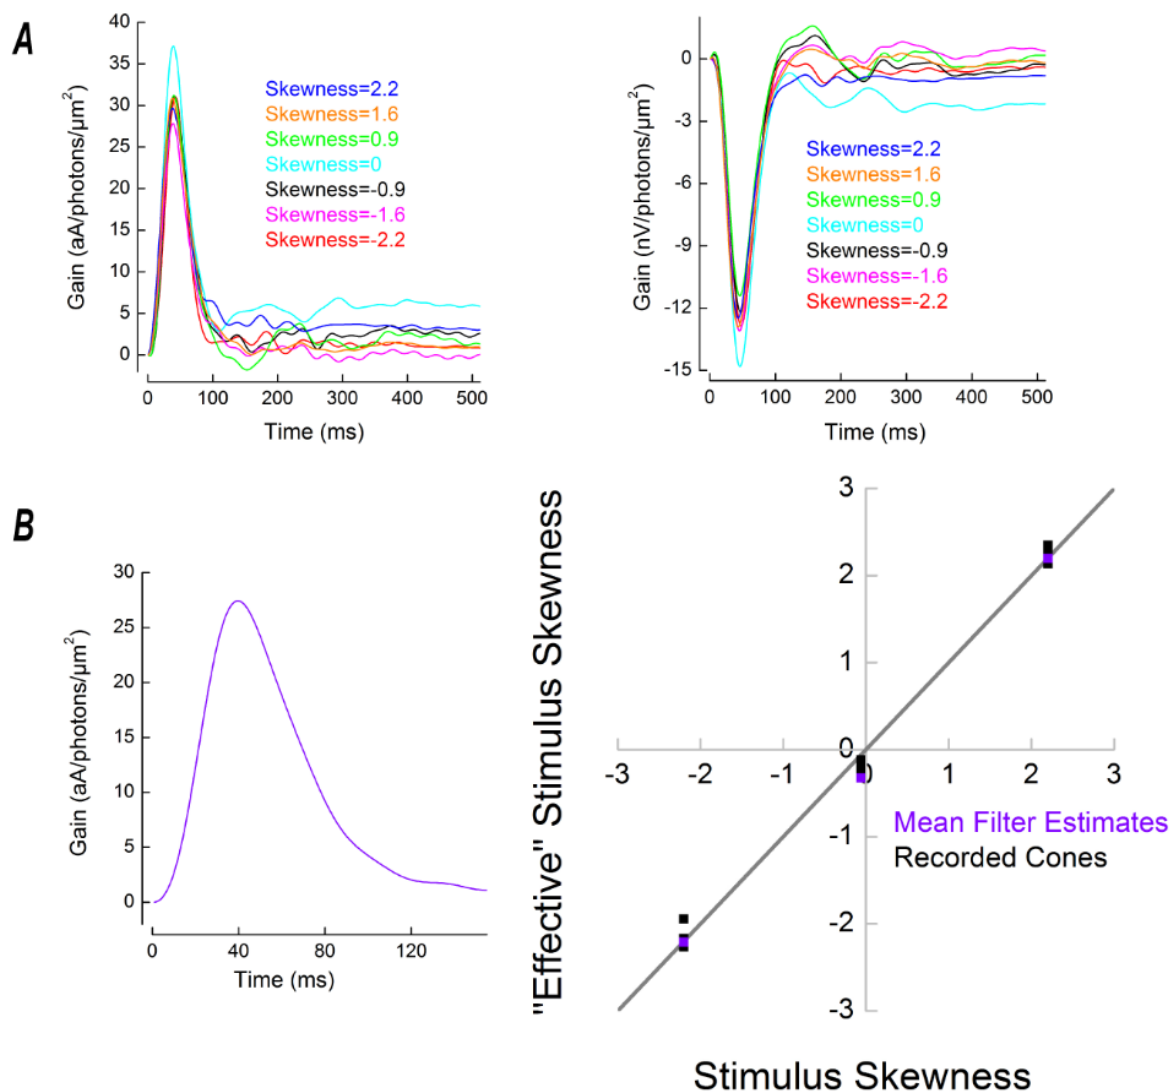

377 **Figure 4**

378 **A.** Representative examples of the cone impulse response functions obtained using the photocurrent (left) and  
379 voltage responses (right) to Skew Stimulus set #1. **B.** Left. The mean cone impulse response function obtained as  
380 the averaged photocurrent impulse response functions to all of the stimuli in Skew stimulus set#1 in all of the  
381 recorded cells (n=8) (Figure 4A left). This mean photocurrent impulse response function was used, via  
382 convolution, to identify segments of the NTSCI where the skewness of the original and “effective” stimuli  
383 remained equal, a subsection of which formed Skew stimulus set#2. Right. Skewness of the “effective” stimuli as  
384 a function of the skewness of the original stimuli for Skew Stimulus set #2. Violet squares correspond to the  
385 “effective” skewness obtained by the convolution of the light stimuli with the mean impulse response function  
386 shown on the left. Black squares depict the “effective” skewness ‘perceived by each cone under Skew Stimulus  
387 set #2 conditions. This was estimated by convolving each Skew Stimulus set #2 stimulus with the cone’s impulse  
388 response function obtained for corresponding stimulus. The grey line describes the condition where temporal  
389 filtering does not affect stimulus skewness. Since all squares are aligned with the grey line, the “effective”  
390 skewness is approximately equal to the original light stimulus skewness. Hence, for Skew Stimulus set #2 cone  
391 temporal filtering does not change the skewness delivered by the stimuli.

392

393 **The processing asymmetry originates exclusively within the**  
394 **phototransduction cascade**

395 What are the cellular mechanisms leading to the differences in the processing of negatively and  
396 positively skewed stimuli? To tease apart the relative contributions of the phototransduction  
397 cascade and the voltage activated membrane conductances, we plotted the skewness of the  
398 voltage responses and photocurrent against each other in Figure 3D. The grey line depicts the  
399 condition where photocurrent and voltage response skews are equal in magnitude. All data  
400 points fall on this line ( $R^2=0.98$ ), meaning that the skewness of the photocurrent accounts for  
401 98% of the skewness of the voltage responses. This means that the phototransduction cascade  
402 is the primary source of the asymmetric processing of the positively and negatively skewed  
403 stimuli.

#### 404 **Temporal filtering affects stimulus skewness**

405 A cone's finite kinetics may act to temporally filter our light stimulus and thus affect the  
406 skewness of the "effective" stimulus perceived by a cone. To determine the "effective" stimuli  
407 skews we first estimated the temporal filters of the cone's photocurrent responses to each of  
408 the skewed stimuli stretches following the Wiener approach (Wiener, 1964; Rieke, 2001;  
409 Figures 4A&B). Next, we convolved the estimated filters with their corresponding skewed  
410 stimuli to obtain the "effective" stimuli perceived by cone photoreceptors. Then we calculated  
411 the skews of the "effective" stimuli and plotted them against the skews of the original light  
412 stimuli on the Figure 3E, where the grey line describes the situation where the "effective" skew  
413 is equal to the original skew. Data points for the positively skewed light stimuli are lower than  
414 the grey line and higher for the negatively skewed light stimuli. Consequently, temporal  
415 filtering reduced the "effective" skewness perceived by the cones.

#### 416 **Asymmetry in the responses to "effective" stimuli**

417 How do goldfish cones process these "effective" stimuli? Figure 3E shows that linear temporal  
418 filtering reduces "effective" skewness and decreases the dynamic range over which responses  
419 to skewed stimuli were measured by almost 30% (from  $\pm 2.2$  to  $\pm 1.6$ ). Therefore, we first  
420 completed our data set by recording the cone's voltage responses to stimuli with "effective"  
421 skews of  $\pm 2.2$  (Figures 4C&5A). Next, we plotted the skews of the responses against the  
422 "effective" stimulus skews (Figure 5B) and found that goldfish cones decrease the magnitude  
423 of skewness when the stimuli are skewed positively and increase the magnitude of skewness  
424 when the stimuli are skewed negatively.

425 Asymmetry in the processing of negatively and positively skewed stimuli is also reflected in  
426 the amplitudes of the corresponding responses: standard deviations of the responses to  
427 negatively skewed stimuli were up to 50% larger than the standard deviations of the responses  
428 to positively skewed stimuli (Figure 5C).

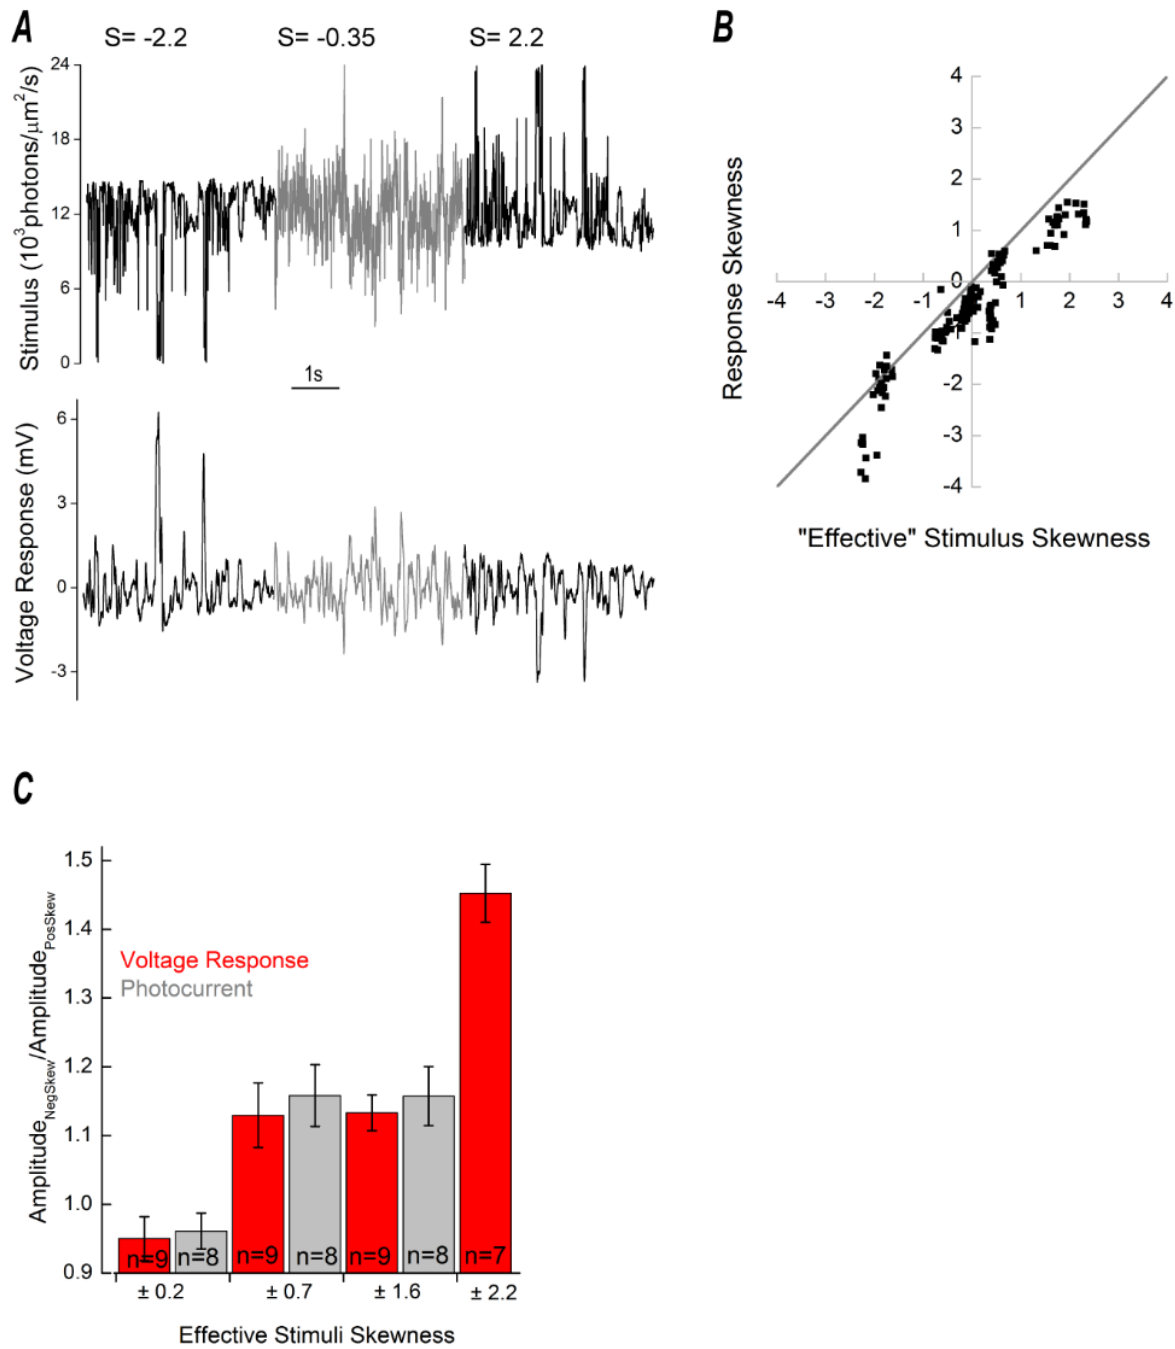

429 **Figure 5**

430 Asymmetries in cone responses to positively and negatively skewed stimuli. **A.** Top. Depiction of Skew Stimulus  
 431 set #2. The key property of this stimulus set is that the light stimulus skewness is not affected by the temporal  
 432 filtering properties of cones (Figure 3B). Bottom. An example of a recorded voltage response to Skew Stimulus  
 433 set #2. **B.** Skews voltage and photocurrent responses against the “effective” stimuli skews. This figure illustrates  
 434 the relation between “effective” stimulus skew (see Figure 3E, Figure 4B) and the skewness for the photocurrent  
 435 ( $n=8$ ) and voltage responses ( $n=9$ ) of cones stimulated with Skew Stimulus set #1, and the voltage responses of  
 436 cones ( $n=7$ ) recorded with Skew Stimulus set #2. This data indicates the cone response skewness differ from the

437 skewness of the “effective” stimulus. Cone responses are less skewed than the stimulus when it delivers higher  
438 levels of positive “effective” skew. The opposite occurs when the stimulus delivers higher levels of negative  
439 “effective” skew, the cone responses are more skewed than the stimulus. The grey line depicts the situation where  
440 the cone response and “effective” stimulus are equally skewed. For illustrative convenience, the voltage responses  
441 skews were multiplied by -1. C. Differences in cone response amplitudes (photocurrent – grey, voltage response  
442 – red) to negatively and positively skewed stimuli for each “effective” skew stimuli pair. When the “effective”  
443 skew magnitude was low ( $\pm 0.2$ ) the photocurrent or voltage responses amplitudes were unaffected by the skew  
444 direction. However, at higher “effective” skew-magnitudes cone response amplitudes to negatively skewed stimuli  
445 were larger than for positively skewed stimuli (photocurrent difference:  $\pm 0.7$ ,  $15.8\% \pm 4.52\%$   $p=0.01$ ;  $\pm 1.6$ ,  $15.7$   
446  $\pm 4.33\%$   $p=0.0083$ ; voltage response difference:  $\pm 0.7$ ,  $13.0 \pm 4.67\%$   $p=0.024$ ;  $\pm 1.6$ ,  $13.3 \pm 2.64\%$   $p=0.00097$ ;  
447  $\pm 2.2$ ,  $45.2 \pm 4.20\%$   $p=0.00004$ ). Changes in response amplitude were assessed as the ratio of standard deviations  
448 of a cell’s response to corresponding negatively and positivity skewed stimuli. The “effective” skew values shown  
449 were estimated by the mean impulse response (Figure 7), obtained using the impulse response functions of all  
450 cells under all stimuli conditions. Data shown as mean  $\pm$  SEM.

451

## 452 **Asymmetry in the cone's output**

453 To be perceived by the downstream neurons, asymmetries in the cone's responses to positively  
454 and negatively skewed stimuli (Figures 5B&C) should be reflected in the synaptic release. In  
455 photoreceptors, glutamate release is directly proportional to the calcium current (Schmitz and  
456 Witkovsky, 1997; Thoreson et al., 2004). Consequently, one can estimate changes in cone  
457 glutamate release by recording its calcium current ( $I_{Ca}$ ).

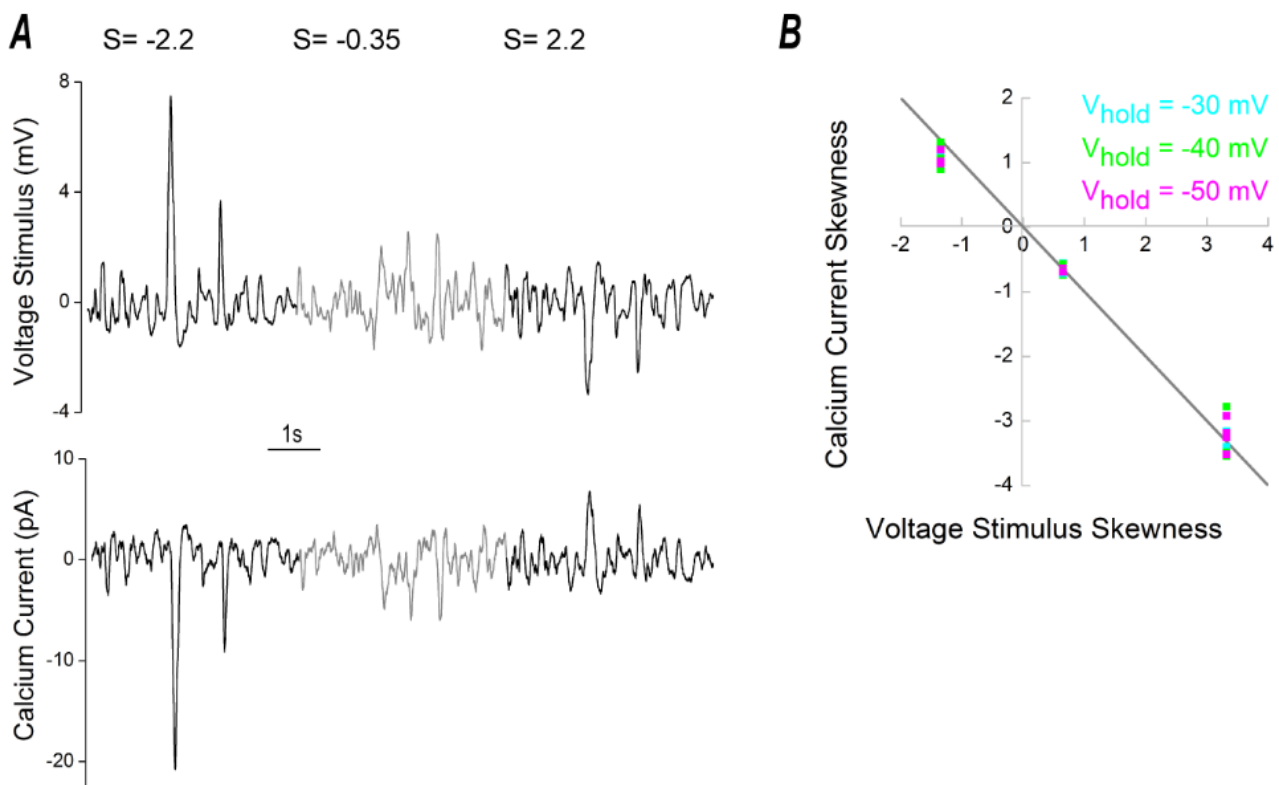

458

## 459 **Figure 6**

460 Asymmetrical processing of skewed stimuli at the cone  $I_{Ca}$  level. **A.** Top panel depicts the mean cone voltage  
461 response to Skew Stimulus set #2, which was used as the stimulus for  $I_{Ca}$  measurements. An example  $I_{Ca}$   
462 measurement, when using this stimulus, is shown in the bottom panel. **B.** Skewness of  $I_{Ca}$  as a function of stimulus  
463 skewness. The measurements of  $I_{Ca}$  were performed at three different potentials along its activation curve: -30mV  
464 (cyan), -40mV (green) and -50mV (magenta). Note that as a decrease in voltage causes an increase in  $I_{Ca}$ , skews

465 for the stimulus and response have opposite signs. The grey line denotes the situation where  $I_{Ca}$  and its stimulus  
466 are equally skewed. Regardless of the holding potential, data points are aligned with grey line, indicating that the  
467 cone's  $I_{Ca}$  maintains any skewness present in its voltage response. Since cone-photoreceptor glutamate-release is  
468 directly proportional to  $I_{Ca}$  (Schmitz and Witkovsky, 1997; Thoreson et al., 2004), it is highly likely cone output  
469 retains any  $I_{Ca}$  skewness.

470  
471

472 We measured skew-dependent modulation of  $I_{Ca}$  by using recorded voltage responses to light  
473 stimuli with “effective” skews of  $\pm 2.2$  and  $-0.35$  as the command voltages at three different  
474 potentials ( $-30$ ,  $-40$ ,  $-50$  mV) along the  $I_{Ca}$  activation curve (Figure 6A). To isolate  $I_{Ca}$   
475 responses, we blocked all other active conductance and subtracted the leak current. We then  
476 plotted the skews of the  $I_{Ca}$  signals against the skews of the voltage responses (Figure 6B).  
477 Note, that since depolarization produces an inward  $I_{Ca}$ , the skews of the voltage response and  
478  $I_{Ca}$  response have opposite signs.

479 Regardless of the clamping potential, all the data points in Figure 6B approximately fall on the  
480 grey line, indicating that the skewness of the cone's signal is largely unaffected by the  
481 transformation from membrane potential to the  $I_{Ca}$ . Consistent with this, the amplitudes of  $I_{Ca}$   
482 during the  $+2.2$  and  $-2.2$  skew conditions differed to the same degree (from  $50 \pm 1.2\%$  to  $54 \pm$   
483  $1\%$  depending on the holding potential) as those of the voltage responses (Figure 5C). Thus,  
484 for negatively and positively skewed stimuli, the asymmetries present at the cone's earlier  
485 processing stages are preserved and even somewhat enhanced in the cone's output.

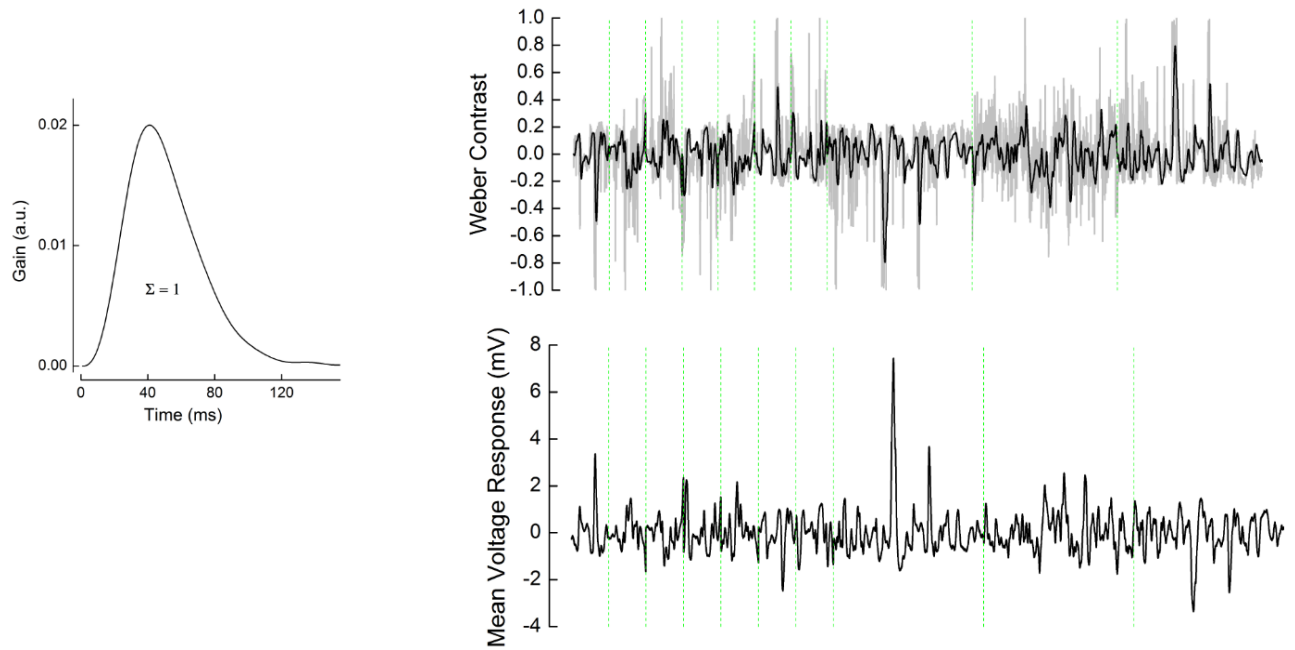

486

## 487 **Figure 7**

488 “Effective” Weber contrast steps. Left. Mean impulse response function used to obtain “effective” Weber contrast.

489 The mean impulse response was estimated by averaging the individual voltage-responses impulse-response

490 functions of all cells for all stimuli ( $n=16$ ) (Figure 4A right, Figure 8B). This mean was scaled such that the

491 integral under its curve was 1. Right. Upper. Grey line: The original light stimuli of Skew Stimulus set #1 and

492 set#2 converted to Weber contrast steps. Black line: The “effective” Weber contrast steps obtained by the

493 convolution of the original Weber contrast steps with the mean impulse response function shown on the left.

494 Bottom. The averaged cone voltage response to each stimuli. For both upper and lower panels, the green dashed

495 lines separate the different stimuli stretches during which the effective skews were (from left to the right): -1.6, -

496 0.2, 0.2, -0.7, 0.06, 1.6, 0.7, -2.2, -0.35, 2.2.

497

498

## 499 **Asymmetrical gain of the cone photoreceptors**

500 What type of non-linear gain leads to the skew-dependent changes in the amplitude of the cone

501 responses? To determine how the voltage response amplitude depends on the Weber contrast

502 step we first converted the “effective” stimuli intensities into Weber contrast steps (Figure 7).

503 Next, we plotted baseline subtracted mean voltage responses (Figure 7) as a function of the



504 “effective” Weber contrast steps (Figure 8A). Figure 8A shows that cone responses are larger  
505 for Weber contrast steps below -0.4 than they are for Weber contrast steps above 0.4. Hence,  
506 the response gain of cones is greater for high negative, than for high positive, contrasts.

507 What kind of input-output relation supports the asymmetric gain of cones? We fitted the  
508 relation between voltage responses and “effective” Weber contrast steps with equation (3)  
509 (Figure 8A orange) and found that the cone voltage response is proportional to Weber contrast  
510 step with an exponent of -0.1251 ( $R^2 \approx 0.95$ , 95% confidence interval  $\pm 0.0959$ ). This  
511 dependence is close to the one determined in the theoretical study by Van Hateren and Snippe  
512 (2006), who suggested that voltage responses of the vertebrate cone is proportional to Weber  
513 contrast with an exponent of -0.12.

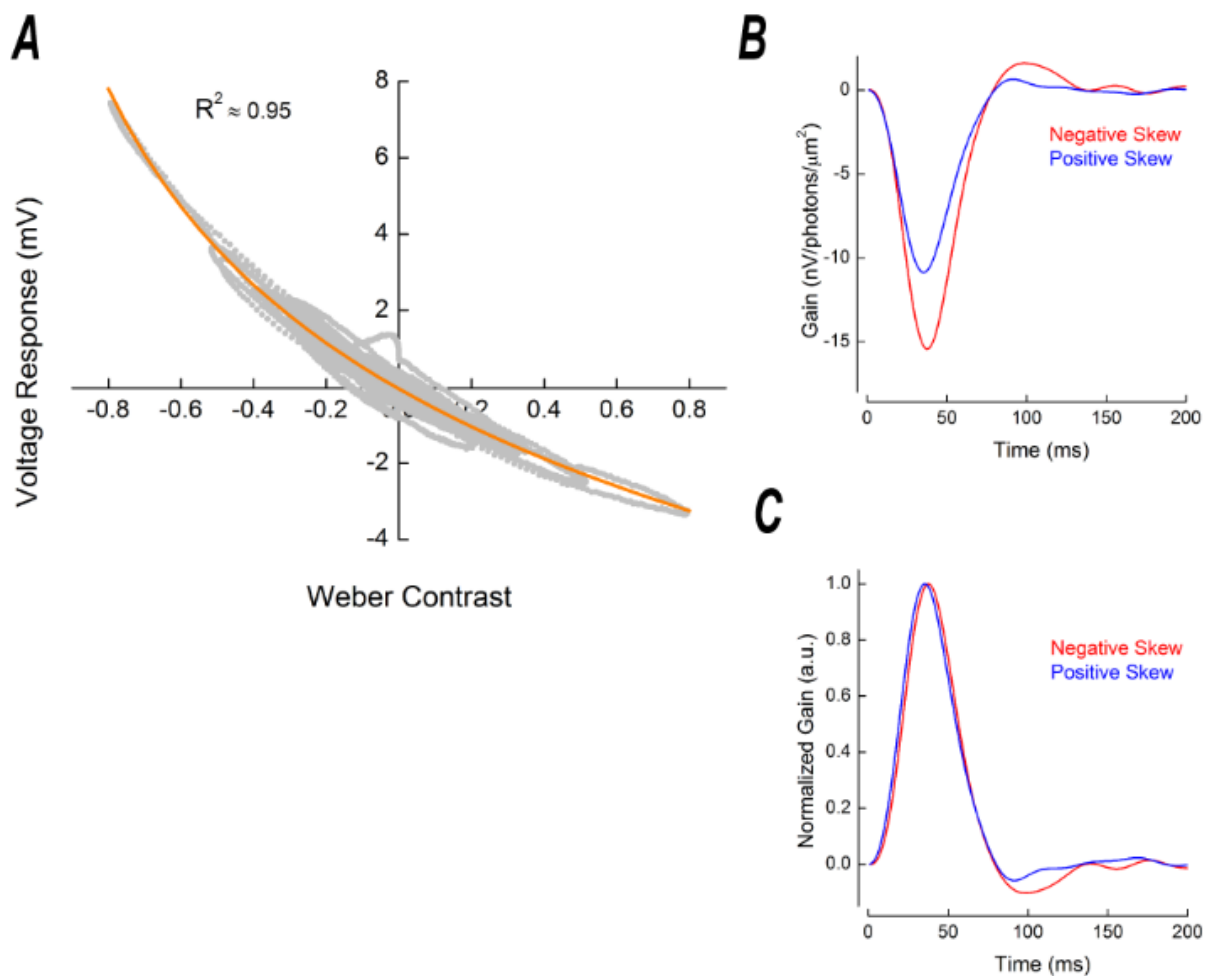

514 **Figure 8**

515 The cone signal transfer properties. **A.** Asymmetric gain of cone photoreceptors. To estimate cone photoreceptor  
516 gain, we plotted the voltage response of cones as a function of “effective” Weber contrast. This relationship was  
517 well described (orange line, adjusted  $R^2 = 0.95$ ) by the Weber contrast power function given in equation (3) and  
518 clearly indicates that cone gain is higher for negative contrasts than for the positive contrasts. The differences  
519 become prominent from Weber contrast steps around  $\pm 0.4$  and are especially vivid for contrast steps beyond  $\pm 0.6$ .  
520 “Effective” Weber contrast was obtained by converting the light intensities into Weber contrast steps with  
521 equation (2), which were then convoluted with the mean cone impulse response function scaled such that integral  
522 under its curve yielded 1 (see methods, Figure 7). The voltage response shown is the baseline-subtracted average  
523 of all cells for each stimulus conditions. In total, there are 19000 data points in this figure. **B.** Stimulus skewness  
524 changes the shape of the cone’s impulse response function. The figure depicts two representative examples of a  
525 cone’s impulse response function in conditions with -2.2 (red) and +2.2 (blue) “effective” stimulus skewness. **C.**  
526 The cone impulse response functions shown in **B**, normalized by the amplitude of their initial lobe. On average,  
527 impulse response functions peaked 3.6 ms, or  $9 \pm 1.0 \%$ , later for negatively skewed stimulus than for the  
528 positively skewed condition ( $p=0.0001$ ,  $n=7$ ) whereas the impulse response function FWHM ( $\Delta = 1 \pm 1.35 \%$ ,  
529  $p=0.37$ ,  $n=7$ ) and the cone integration time ( $\Delta = 1.1 \pm 1.61 \%$ ,  $p = 0.51$ ,  $n=7$ ) were unchanged.

530

### 531 **Stimulus skewness affects the shape of the cone impulse response function**

532 The processing time of cones is inversely proportional to light intensity such that responses to  
533 steps of strong positive contrast peak earlier than responses to strong negative contrasts  
534 (Nikonov et al., 2000; Lee et al., 2003; van Hateren, 2005; Van Hateren and Snippe, 2006;  
535 Angueyra et al., 2021). Therefore, one might expect that such a dependency would lead to a  
536 difference in the time courses of the responses to positively and negatively skewed stimuli.

537 To test whether stimulus skewness has an effect on the cone kinetics, we compared impulse  
538 response functions derived from the voltage responses to the -2.2 and the +2.2 “effective” skew  
539 stimuli (Figure 8B). To better visualize the differences in kinetics we normalized these impulse  
540 response functions by the amplitude of their initial lobe (Figure 8C). Interestingly, while on  
541 average the cone impulse response functions peaked 3.6 ms (or  $9 \pm 1.0 \%$ ) later for the

542 negatively skewed stimulus than for the positively skewed stimulus (Figure 8C,  $p=0.0001$ ,  
543  $n=7$ ), there were no statistically significant differences neither in its full width at the half  
544 maximum (FWHM) ( $\Delta = 1.0 \pm 1.35\%$ ;  $p=0.37$ ;  $n=7$ ), nor in the cone's integration time ( $\Delta=$   
545  $1.1 \pm 1.61\%$ ;  $p=0.51$ ;  $n=7$ ).

## 546 **Discussion**

547 We studied responses of cone photoreceptors to differently skewed stimuli and found cone  
548 response amplitudes to negatively skewed stimuli are up to 50% greater than to positively  
549 skewed stimuli (Figures 2, 5A&C, 6A, 7). This amplitude difference originates from the  
550 asymmetrical weighting of positive and negative contrasts by the phototransduction cascade.  
551 Its gain is inversely proportional to Weber contrast steps raised to the power of -0.125 (Van  
552 Hateren and Snippe, 2006; Figure 8A) and may serve as the basis for the Blackshot mechanism  
553 proposed by Chubb et al. (1994, 2004). Additionally, we observed stimulus skewness changes  
554 the cone's impulse response function shape. For the normalized impulse response function, the  
555 rising flank was faster and the falling flank slower for positively compared to negatively  
556 skewed stimuli (Figure 8C).

## 557 **The Blackshot mechanism**

558 Psychophysical studies reported that humans can discriminate visual stimuli based on skewness  
559 (Chubb et al., 1994, 2004; Graham et al., 2016). Our results suggest that this discrimination  
560 starts as early as the phototransduction cascade. Chubb et al. (1994, 2004) described the  
561 sensitivity to skewness with the so-called Blackshot mechanism, which has a disproportionately  
562 strong response to high negative contrasts. Our data indicates that differences in the response  
563 to positively and negatively skewed stimuli originates in the phototransduction's asymmetric  
564 gain function, which leads to higher response amplitudes to negative contrasts than to positive

565 contrasts (Figure 5C, Figure 8A). Moreover, in full accordance with psychophysical studies,  
566 the difference in cone response amplitudes to positive and negative contrasts becomes more  
567 prominent with larger contrast steps (Figure 8A). For the  $\pm 1.6$  “effective” skew stimuli pair,  
568 where the maximal “effective” Weber contrast step was 0.5, the difference in the response was  
569 about 15% while for the  $\pm 2.2$  “effective” skew pair, where the maximal “effective” Weber  
570 contrast step was 0.8, the difference was almost 50% (Figure 5C).

571 Asymmetries in responses to positive and negative contrasts are reported throughout the entire  
572 visual system in various species (Laughlin, 1981; Van Hateren, 1997; Lee et al., 2003; Zaghoul  
573 et al., 2003; Jin et al., 2008; Yeh et al., 2009; Endeman and Kamermans, 2010; Baden et al.,  
574 2013; Kremkow et al., 2014; Cooper and Norcia, 2015), including the human visual cortex  
575 (Zemon et al., 1988; Kremkow et al., 2014). Although it was shown that differences in response  
576 amplitudes to positive and negative contrasts are additionally amplified by the visual cortex  
577 (Kremkow et al., 2014), our data clearly indicates that the primary origin of this asymmetry is  
578 within the cone’s phototransduction cascade.

579 The phototransduction’s asymmetric gain function enables cones to efficiently encode the  
580 entire range of contrasts present in natural scenes. Photoreceptors encode changes in their input  
581 with a graded output. Information theory states that such a system encodes a signal efficiently  
582 only when the statistical distribution of its output is Gaussian, which implies a symmetrical  
583 engagement of the system’s dynamic range (Shannon, 1948; Van Hateren, 1997). On the other  
584 hand, from a given mean, the light intensity cannot decrease by more than 100%, but can easily  
585 increase by many orders of magnitude. This means that the dynamic range of positive contrasts  
586 is wider than that of negative. Thus, although some visual scenes can be skewed negatively  
587 (Tkačik et al., 2014), the total distribution of contrasts at any given intensity is skewed  
588 positively with negative contrasts being smaller in amplitude, but more frequent than positive  
589 contrasts (Laughlin, 1983; Ruderman, 1994; Van Hateren, 1997; Ruderman et al., 1998;

590 Cooper and Norcia, 2015). Consequently, to encode signals efficiently and to provide  
591 symmetrical outputs, cones compensate for this asymmetry in their input by weighting high  
592 positive contrasts with lower gain (Figure 8A), such that when stimulated with the entire range  
593 of contrasts in natural scenes, cones provide a Gaussian output (Laughlin, 1983; Van Hateren,  
594 1997; Endeman and Kamermans, 2010). We therefore suggest that the Blackshot mechanism  
595 is simply a consequence of the more fundamental necessity to efficiently encode the range of  
596 contrasts present in natural scenes.

### 597 **Shape of the impulse response function**

598 We found the cone's impulse response function peaks  $\approx 3.6$  ms later for negatively skewed  
599 stimuli whereas the cone's integration time is unaffected by stimulus skewness (Figure 8B&C).  
600 The rising and falling flanks of the cone's impulse response are governed by different  
601 biophysical mechanisms. The former is heavily influenced by the phosphodiesterase (PDE)  
602 hydrolysis of cGMP. The time constant of this process is inversely proportional to the light  
603 intensity. Hence, it decreases upon positive, and increases upon negative contrast steps  
604 (Nikonov et al., 2000; van Hateren, 2005; Endeman and Kamermans, 2010). The terminating  
605 flank is largely regulated by the guanylyl cyclase (GC) mediated production of cGMP which  
606 is modulated by the  $\text{Ca}^{2+}$  influx through the CNG channels. The time constant of this process  
607 is not light-dependent but its gain is inversely proportional to the 4th power of light intensity  
608 (Burns et al., 2002; van Hateren, 2005; van Hateren and Snippe, 2007). The interplay between  
609 these two underlying processes is thought to account for the cone's impulse response function  
610 shape, the asymmetric rising and falling response phases to sinusoidal stimuli, and for light  
611 adaptation to decreases in light intensity being slower than for light intensity increases (Baylor  
612 and Hodgkin, 1973; Lankheet et al., 1991; Nikonov et al., 2000; Lee et al., 2003; van Hateren,  
613 2005; Endeman and Kamermans, 2010; Angueyra et al., 2021).

614 For our stimuli, the PDE hydrolysis of cGMP time-constant will have been shorter during  
615 positively skewed stimuli as all large changes in light intensity were associated with positive  
616 contrasts. This in turn manifest as a faster rate of change in the impulse response functions'  
617 initial flank and hence an earlier time to peak. For negatively skewed stimuli, as all large  
618 changes in light intensity were associated with negative contrast, GC mediated production of  
619 cGMP was pronounced. The highly non-linear light-dependent gain function of this process,  
620 and the ensuing  $\text{Ca}^{2+}$  influx when cones depolarized, increased the rate the cone CNG channels  
621 reopened. This resulted in an increased decay rate for the terminating flank of the impulse  
622 response function. Hence, the initial flank's faster onset rate during the positively skewed  
623 stimulus is largely offset by the terminating flank's faster decay rate during the negatively  
624 skewed stimulus. Consequently, the cone impulse response function integration time to  
625 positive and negative skewed stimuli does not differ while it's time to peak does.

## 626 **Relation to previous studies using skewed stimuli**

627 Why did previous studies find stimulus skewness had little to no effect on RGC (Tkačik et al.,  
628 2014) and LGN neurons (Bonin et al., 2006)? We suggest a methodological factor. In both  
629 studies, a large proportion of the stimulus power spectrum was outside the cone's temporal  
630 frequency bandwidth. Indeed, Bonin et al. (2006) used white-noise stimuli bandlimited to 124  
631 Hz to study cat LGN neurons responses, while the cat visual system barely responds to  
632 frequencies above 32 Hz (Shapley and Victor, 1978; Mante et al., 2005). Similarly, Tkacik et  
633 al. (2014) studied salamander RGC responses with white-noise bandlimited to 30 Hz, whereas  
634 the salamander retina hardly reacts to frequencies above 10 Hz (Kim and Rieke, 2001). Thus,  
635 in both these studies a large part of their stimuli were 'filtered out' and the remaining  
636 "effective" stimuli were only able to elicit marginal skew dependent effects.

637 To illustrate this point, we estimated the "effective" stimuli delivered by Bonin et al. (2006)  
638 and Tkacik et al. (2014) using Van Hateren's cone photoreceptor model (van Hateren and

639 Snippe, 2007). Simulations of the cat cone indicate that while a wide range of “effective”  
640 Weber contrasts were present (Figure 9A) the “effective” skewness was approximately half  
641 that of the original stimuli employed, reducing from a range of  $\pm 0.4$  to approximately  $\pm 0.2$   
642 (Figure 9B). Hence, both stimuli delivered largely similar distributions of “effective” Weber  
643 contrasts. As a result, the simulated voltage responses to the positive and negatively skewed  
644 stimuli only differed in amplitude by approximately 4% (Figure 9 C, D), which is within the  
645 range of standard error estimates for the amplitude differences we find here (Figure 5C).

646 Simulations of the salamander cone reveal a different situation that none the less leads to the  
647 same outcome. The “effective” skewness range remained relatively large despite being less  
648 than half that of the original stimuli employed ( $\pm 0.8$  vs  $\pm 2$ , Figure 10B), but the range of  
649 “effective” contrasts reduced to just  $\pm 0.2$  Weber unit (Figure 10A). Over this limited range of  
650 contrasts the cone photoreceptor gain is mostly symmetrical (Figure 8A) and as such the  
651 voltage response amplitude to the negatively skewed stimulus was only 2% higher than for the  
652 positively skewed stimulus (Figure 10C&D). Hence, even though the stimuli had substantially  
653 different distributions of “effective” Weber contrasts, the range of contrast values they  
654 delivered were too narrow to generate a notable effect.

655 To conclude, our results show that to study visual processes under varying skewness  
656 conditions, the stimuli must be able to deliver sufficient levels of “effective” skewness over  
657 sufficient ranges of “effective” Weber contrasts.

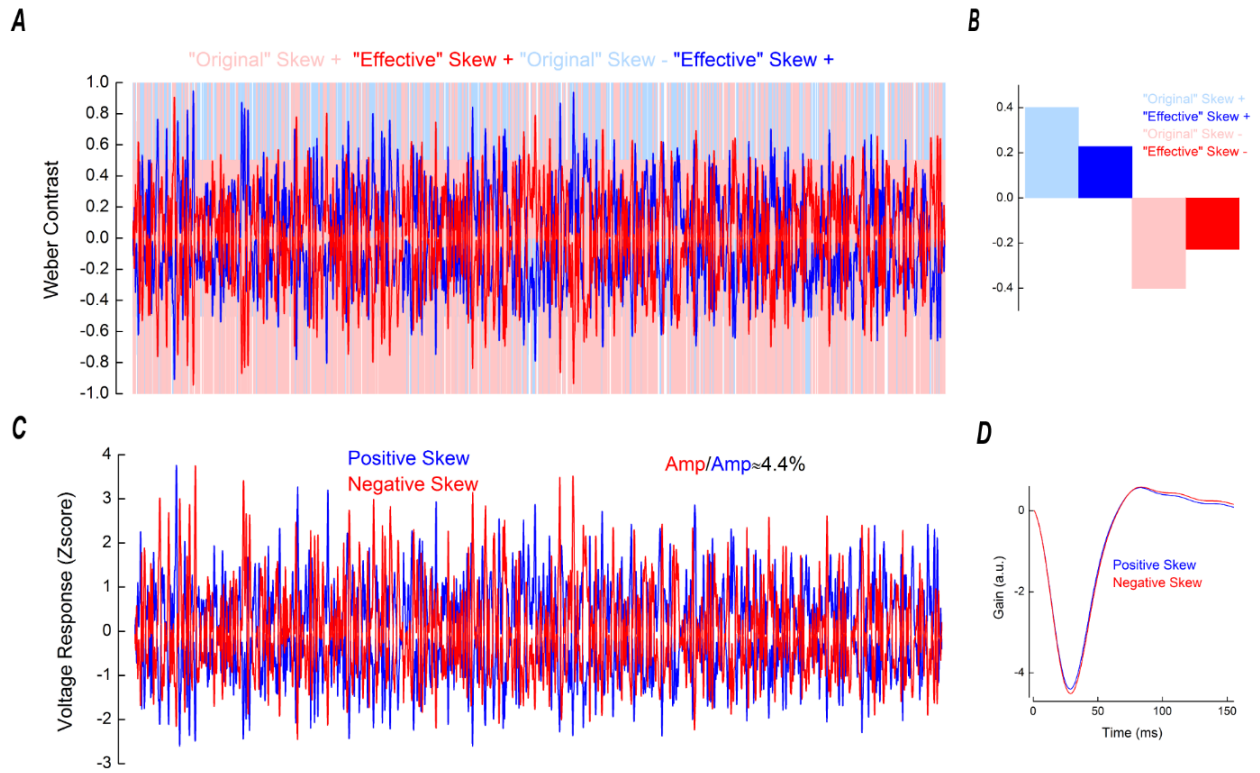

658

## 659 **Figure 9**

660 Simulated responses of cat cone photoreceptors. **A.** Light blue and light red lines depict the positively and  
661 negatively skewed stimuli used by Bonin et al. (2006) and here for the simulation. Blue and red lines depict the  
662 “effective” positively and negatively skewed stimuli, obtained by the convolution of the “original” stimuli with  
663 the impulse response functions shown in **D.** **B.** Comparison of the skews of the “original” and “effective”  
664 positively (blue) and “negatively” (red) skewed stimuli. Due to the temporal filtering the “effective” stimuli are  
665 almost symmetrical around the mean, their skew range having decreased from  $\pm 0.4$  to  $\approx \pm 0.2$ . **C.** Simulated cone  
666 voltage responses to the positively (blue) and negatively (red) skewed stimuli. The response amplitude to the  
667 negatively skewed stimulus was 4% higher than the response amplitude to the positively skewed stimulus. The  
668 simulated voltage response amplitudes were quantified by their standard deviations, as for Figure 5C. Parameters  
669 for the simulation are listed in the Table 1. **D.** Impulse response functions derived from the simulated cat cone  
670 voltage responses. These impulse response functions were used to estimate the “effective” stimuli shown in **A.**



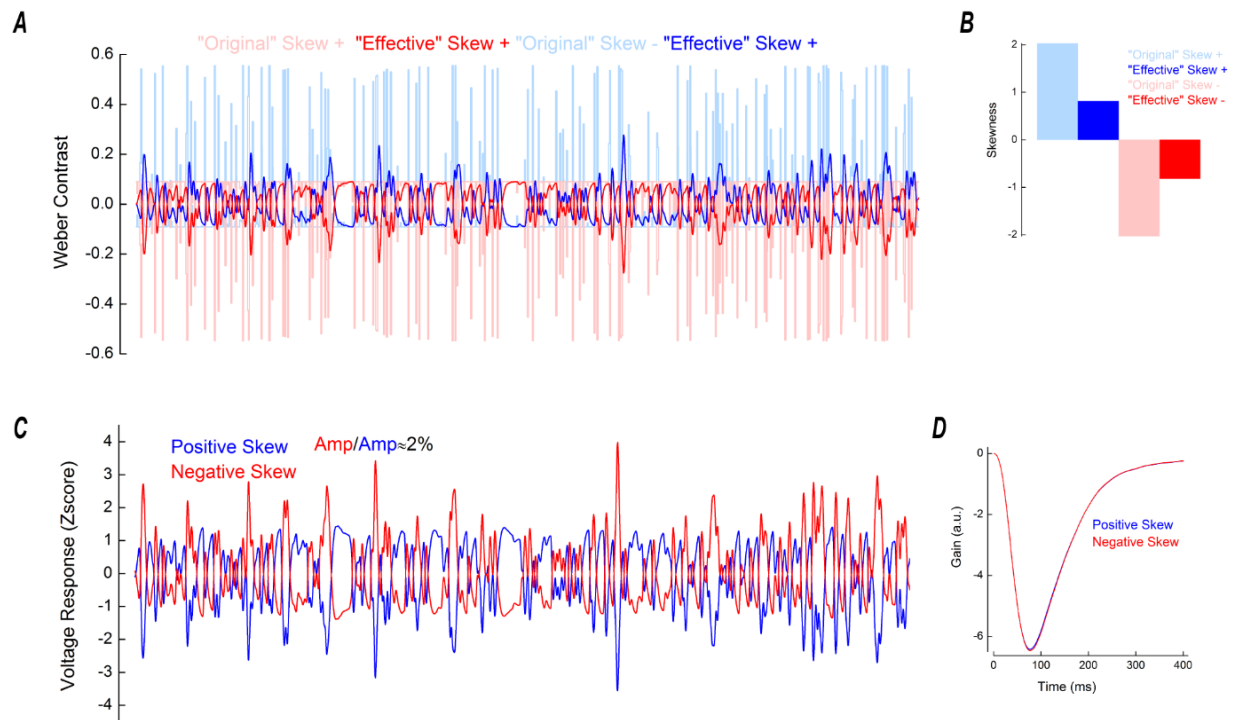

671

672

## Figure 10

673

Simulated responses of salamander cone photoreceptors. **A.** Light blue and light red lines depict the positively

674

and negatively skewed stimuli used in the simulation. These stimuli had the same properties as those used by

675

Tkacik et al.(2014). Blue and red lines depict the “effective” positively and negatively skewed stimuli, obtained

676

by the convolution of the “original” stimuli with the impulse response functions shown in **D.** The temporal filtering

677

leads to small Weber contrast ranges of the “effective” stimuli. **B.** Comparison of the skews of the “original” and

678

“effective” positively (blue) and “negatively” (red) skewed stimuli. The salamander cone’s temporal filtering

679

reduced the stimulus skewness from  $\pm 2$  to  $\pm 0.8$ . **C.** Simulated cone voltage responses to the positively (blue) and

680

negatively (red) skewed stimuli. The response amplitude to the negatively skewed stimulus was 2% higher than

681

the response amplitude to the positively skewed stimulus. The simulated voltage response amplitudes were

682

quantified by their standard deviations, as for Figure 5C. Parameters for the simulation are listed in the Table 1.

683

**D.** Impulse response functions derived from the simulated salamander cone voltage responses. These impulse

684

response functions were used to estimate the “effective” stimuli shown in **A.**

## 685 References

686

Angueyra JM, Baudin J, Schwartz GW, Rieke F (2021) Multiple time scales of adaptation

687

allow cones to encode the inputs created by visual exploration of natural scenes.

688 bioRxiv:2021.02.13.431101.

689 Baccus SA, Meister M (2002) Fast and slow contrast adaptation in retinal circuitry. *Neuron*  
690 36:909–919.

691 Baden T, Schubert T, Chang L, Wei T, Zaichuk M, Wissinger B, Euler T (2013) A tale of two  
692 retinal domains: Near-Optimal sampling of achromatic contrasts in natural scenes through  
693 asymmetric photoreceptor distribution. *Neuron* 80:1206–1217

694 Baylor DA, Hodgkin AL (1973) Detection and resolution of visual stimuli by turtle  
695 photoreceptors. *J Physiol* 234:163–198

696 Bonin V, Mante V, Carandini M (2006) The statistical computation underlying contrast gain  
697 control. *J Neurosci* 26:6346–6353.

698 Burns ME, Mendez A, Chen J, Baylor DA (2002) Dynamics of cyclic GMP synthesis in retinal  
699 rods. *Neuron* 36:81–91.

700 Chichilnisky EJ (2001) A simple white noise analysis of neuronal light responses. *Netw*  
701 *Comput Neural Syst* 12:199–213.

702 Chubb C, Econopouly J, Landy MS (1994) Histogram contrast analysis and the visual  
703 segregation of IID textures. *J Opt Soc Am A* 11:2350.

704 Chubb C, Landy MS, Econopouly J (2004) A visual mechanism tuned to black. *Vision Res*  
705 44:3223–3232.

706 Cooper EA, Norcia AM (2015) Predicting Cortical Dark/Bright Asymmetries from Natural  
707 Image Statistics and Early Visual Transforms. *PLoS Comput Biol* 11:1–25.

708 Daly SJA, Normann R (1985) Temporal Information Processing In Cones: Effects of Light  
709 Adaptation on Temporal Summation and Modulation. *Vision Res* 25:1197–1206.

- 710 Donner K, Hemila S (1996) Modelling the spatio-temporal modulation response of ganglion  
711 cells with difference-of-Gaussians receptive fields: Relation to photoreceptor response  
712 kinetics. *Vis Neurosci* 13:173–186.
- 713 Endeman D, Kamermans M (2010) Cones perform a non-linear transformation on natural  
714 stimuli. *J Physiol* 588:435–446
- 715 Fahrenfort I, Habets RL, Spekreijse H, Kamermans M (1999) Intrinsic cone adaptation  
716 modulates feedback efficiency from horizontal cells to cones. *J Gen Physiol* 114:511–524
- 717 Frazor RA, Geisler WS (2006) Local luminance and contrast in natural images. *Vision Res*  
718 46:1585–1598.
- 719 Graham D, Schwarz B, Chatterjee A, Leder H (2016) Preference for luminance histogram  
720 regularities in natural scenes. *Vision Res* 120:11–21
- 721 Howlett MHC, Smith RG, Kamermans M (2017) A novel mechanism of cone photoreceptor  
722 adaptation. *PLoS Biol* 15:e2001210
- 723 Jin JZ, Weng C, Yeh CI, Gordon JA, Ruthazer ES, Stryker MP, Swadlow HA, Alonso JM  
724 (2008) On and off domains of geniculate afferents in cat primary visual cortex. *Nat*  
725 *Neurosci* 11:88–94.
- 726 Kamar S, Howlett MHC, Kamermans M (2019) Silent-substitution stimuli silence the light  
727 responses of cones but not their output. *J Vis* 19:1–11.
- 728 Kamermans W, Ariette M, Farajnia S, Howlett M, Kamermans M (2017) A quantitative model  
729 for adaptation of in cone photoreceptors to contrast.
- 730 Kim KJ, Rieke F (2001) Temporal contrast adaptation in the input and output signals of  
731 salamander retinal ganglion cells. *J Neurosci* 21:287–299.

- 732 Korenberg MJ (1991) Parallel cascade identification and kernel estimation for nonlinear  
733 systems. *Ann Biomed Eng* 19:429–455.
- 734 Kremkow J, Jin J, Komban SJ, Wang Y, Lashgari R, Li X, Jansen M, Zaidi Q, Alonso JM  
735 (2014) Neuronal nonlinearity explains greater visual spatial resolution for darks than  
736 lights. *Proc Natl Acad Sci U S A* 111:3170–3175.
- 737 Lankheet MJM, van Wezel RJA, van de Grind WA (1991) Light adaptation and frequency  
738 transfer properties of cat horizontal cells. *Vision Res* 31:1129–1142.
- 739 Laughlin S (1981) A simple coding procedure enhances a neuron’s information capacity.  
740 *Zeitschrift fur Naturforsch - Sect C J Biosci* 36:910–912.
- 741 Laughlin S (1983) Matching Coding to Scenes to Enhance Efficiency. :42–52.
- 742 Lee BB, Dacey DM, Smith VC, Pokorny J (2003) Dynamics of sensitivity regulation in primate  
743 outer retina: The horizontal cell network. *J Vis* 3:513–526.
- 744 Malchow RP, Yazulla S (1986) Separation and light adaptation of rod and cone signals in the  
745 retina of the goldfish. *Vision Res* 26:1655–1657.
- 746 Mante V, Frazor RA, Bonin V, Geisler WS, Carandini M (2005) Independence of luminance  
747 and contrast in natural scenes and in the early visual system. *Nat Neurosci* 8:1690–1697  
748 Available at: <http://www.nature.com/doi/10.1038/nn1556>.
- 749 Nikonov S, Lamb TD, Pugh EN (2000) The role of steady phosphodiesterase activity in the  
750 kinetics and sensitivity of the light-adapted salamander rod photoresponse. *J Gen Physiol*  
751 116:795–824
- 752 Rieke F (2001) Temporal contrast adaptation in salamander bipolar cells. *J Neurosci* 21:9445–  
753 9454.

- 754 Ruderman DL (1994) The statistics of natural images. *Netw Comput Neural Syst* 5:517–548.
- 755 Ruderman DL, Cronin TW, Chiao C-C (1998) Statistics of cone responses to natural images:  
756 implications for visual coding. *J Opt Soc Am A* 15:2036.
- 757 Schmitz Y, Witkovsky P (1997) Dependence of photoreceptor glutamate release on a  
758 dihydropyridine- sensitive calcium channel. *Neuroscience* 78:1209–1216.
- 759 Shannon CE (1948) A Mathematical Theory of Communication. 27:379–423.
- 760 Shapley RM, Victor JD (1978) The effect of contrast on the transfer properties of cat retinal  
761 ganglion cells. *J Physiol*:275–298.
- 762 Simoncelli EP, Pillow JW, Paninski L, Schwartz O (2004) Characterization of Neural  
763 Responses with Stochastic Stimuli.
- 764 Student (1908) The probable Error of a Mean. *Biometrika* 6:1–25.
- 765 Thoreson WB, Rabl K, Townes-Anderson E, Heidelberger R (2004) A highly Ca<sup>2+</sup>-sensitive  
766 pool of vesicles contributes to linearity at the rod photoreceptor ribbon synapse. *Neuron*  
767 42:595–605.
- 768 Tkačik G, Ghosh A, Schneidman E, Segev R (2014) Adaptation to changes in higher-order  
769 stimulus statistics in the salamander retina. *PLoS One* 9.
- 770 van Hateren H (2005) A cellular and molecular model of response kinetics and adaptation in  
771 primate cones and horizontal cells. *J Vis* 5:331–347.
- 772 Van Hateren JH (1997) Processing of natural time series of intensities by the visual system of  
773 the blowfly. *Vision Res* 37:3407–3416.
- 774 Van Hateren JH, Rüttiger L, Sun H, Lee BB (2002) Processing of natural temporal stimuli by  
775 macaque retinal ganglion cells. *J Neurosci* 22:9945–9960.

- 776 van Hateren JH, Snippe HP (2007) Simulating human cones from mid-mesopic up to high-  
 777 photopic luminances. *J Vis* 7:1.
- 778 Van Hateren JH, Snippe HP (2006) Phototransduction in primate cones and blowfly  
 779 photoreceptors: Different mechanisms, different algorithms, similar response. *J Comp*  
 780 *Physiol A Neuroethol Sensory, Neural, Behav Physiol* 192:187–197.
- 781 Vroman R, Klaassen LJ, Howlett MHC, Cenedese V, Klooster J, Sjoerdsma T, Kamermans M  
 782 (2014) Extracellular ATP Hydrolysis Inhibits Synaptic Transmission by Increasing pH  
 783 Buffering in the Synaptic Cleft. *PLOS Biol* 12:e1001864
- 784 Welch PD (1967) Welch's Periodogram.pdf. *IEEE Trans Audio Electroacoust* 15:70–73.
- 785 Wiener N (1964) Extrapolation, Interpolation, and Smoothing of Stationary Time Series. The  
 786 MIT Press.
- 787 Yeh CI, Xing D, Shapley RM (2009) “Black” responses dominate macaque primary visual  
 788 cortex V1. *J Neurosci* 29:11753–11760.
- 789 Zaghloul KA, Boahen K, Demb JB (2003) Different circuits for ON and OFF retinal ganglion  
 790 cells cause different contrast sensitivities. *J Neurosci* 23:2645–2654.
- 791 Zemon V, Gordon J, Welch J (1988) Asymmetries in ON and OFF visual pathways of humans  
 792 revealed using contrast-evoked cortical potentials. *Vis Neurosci* 1:145–150.

793

794 **Table 1**

| Parameter                                                           | Goldfish               | Cat                     | Salamander             |
|---------------------------------------------------------------------|------------------------|-------------------------|------------------------|
| Lifetime of activated conopsin                                      | 8 – 31 ms              | 8 ms                    | 88 ms                  |
| Lifetime of activated transducin                                    | 16 – 30 ms             | 12 ms                   | 101 ms                 |
| Dark PDE activity                                                   | 0.003 ms <sup>-1</sup> | 0.0028 ms <sup>-1</sup> | 0.003 ms <sup>-1</sup> |
| Constant of the dependence of PDE activity on transducin activation | 0.00004<br>0.00023     | -                       | 0.00016<br>0.0002      |

|                                           |             |        |        |
|-------------------------------------------|-------------|--------|--------|
| Apparent Hill coefficient of CNG channels | 1           | 1      | 1      |
| Hill coefficient of GC activation         | 4           | 4      | 4      |
| Time constant of calcium extrusion        | 12 -28 ms   | 9 ms   | 24 ms  |
| GC activation constant                    | 0.1         | 0.09   | 0.1    |
| Capacitive membrane time constant         | 15 ms       | 6 ms   | 15 ms  |
| Parameter of membrane non-linearity       | 0.7 – 1.1   | 0.8    | 0.85   |
| Constant of membrane nonlinearity         | 0.03 – 0.07 | 0.07   | 0.085  |
| Time constant of membrane non-linearity   | 300 ms      | 120 ms | 300 ms |

795

796 Parameters of the Van Hateren model used to simulate the responses of goldfish, salamander

797 and cat cones. For the goldfish, model parameters were obtained by fitting cones responses

798 (n=7) to Skew Stimulus Set #2 while constraining the range the parameters varied to within

799 that determined by Endeman and Kamermans (2010). For the cat and salamander, parameters

800 were adjusted such that the simulated-cone's impulse response function time-to-peak

801 approximately matched that estimated, respectively, by Donner and Hemila (1996) and by

802 Rieke (2001) and Baccus and Meister (2002).
